# Supplementary material
Source: PubMed Central journal article supplement (PMC2040895)

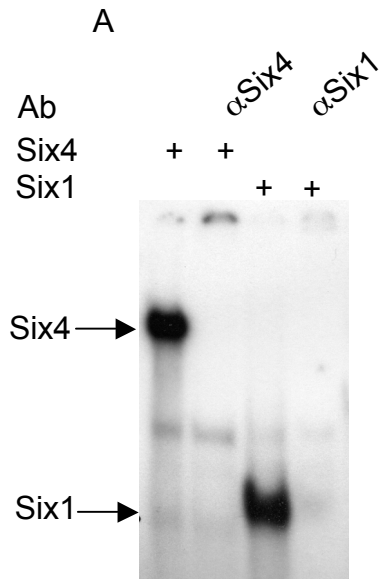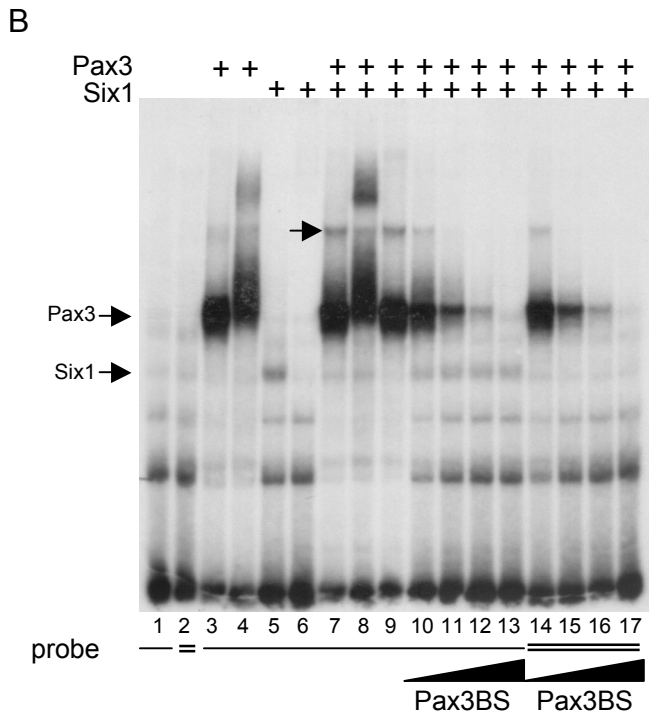

Supplement: pnas_0611299104_2.pdf [file pnas_0611299104_2.pdf]
